# Supplementary material for: The peptide agonist-binding site of the glucagon-like peptide-1 (GLP-1) receptor based on site-directed mutagenesis and knowledge-based modelling
Source: Oxford University Press journal article supplement (doi:10.1042/bsr20150253), 2015-11-24

## SUPPLEMENTARY MATERIAL

**Figure S1:** Overview of modelling procedure. See Methods for narrative.

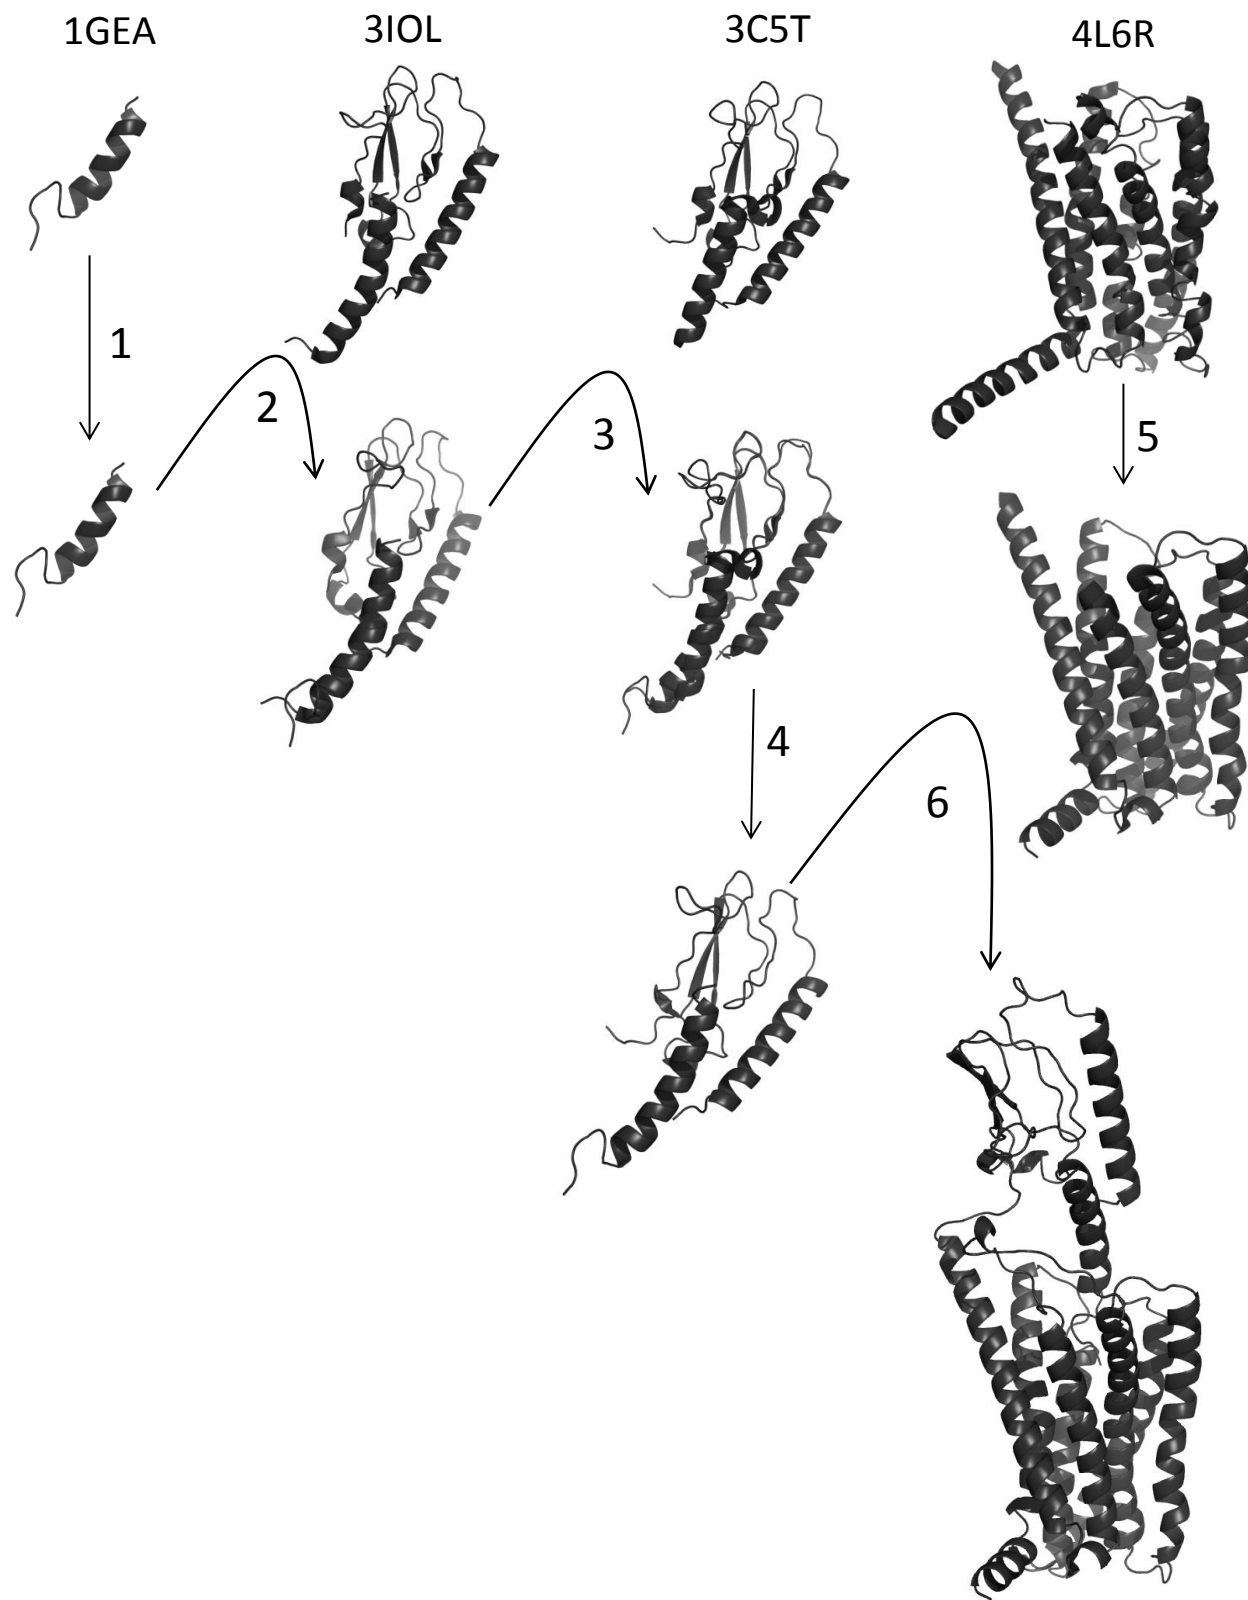

**Figure S2:** Summary of effects on GLP-1 pharmacology (affinity and ability to activate cAMP pathway) in published site-directed mutagenesis studies focussed on residues in the transmembrane helices and loops of the 7TM domain of GLP-1R. See Table S1 for details.

**Key:**

- Effect on pharmacology
- No significant effect
- No expression or detection

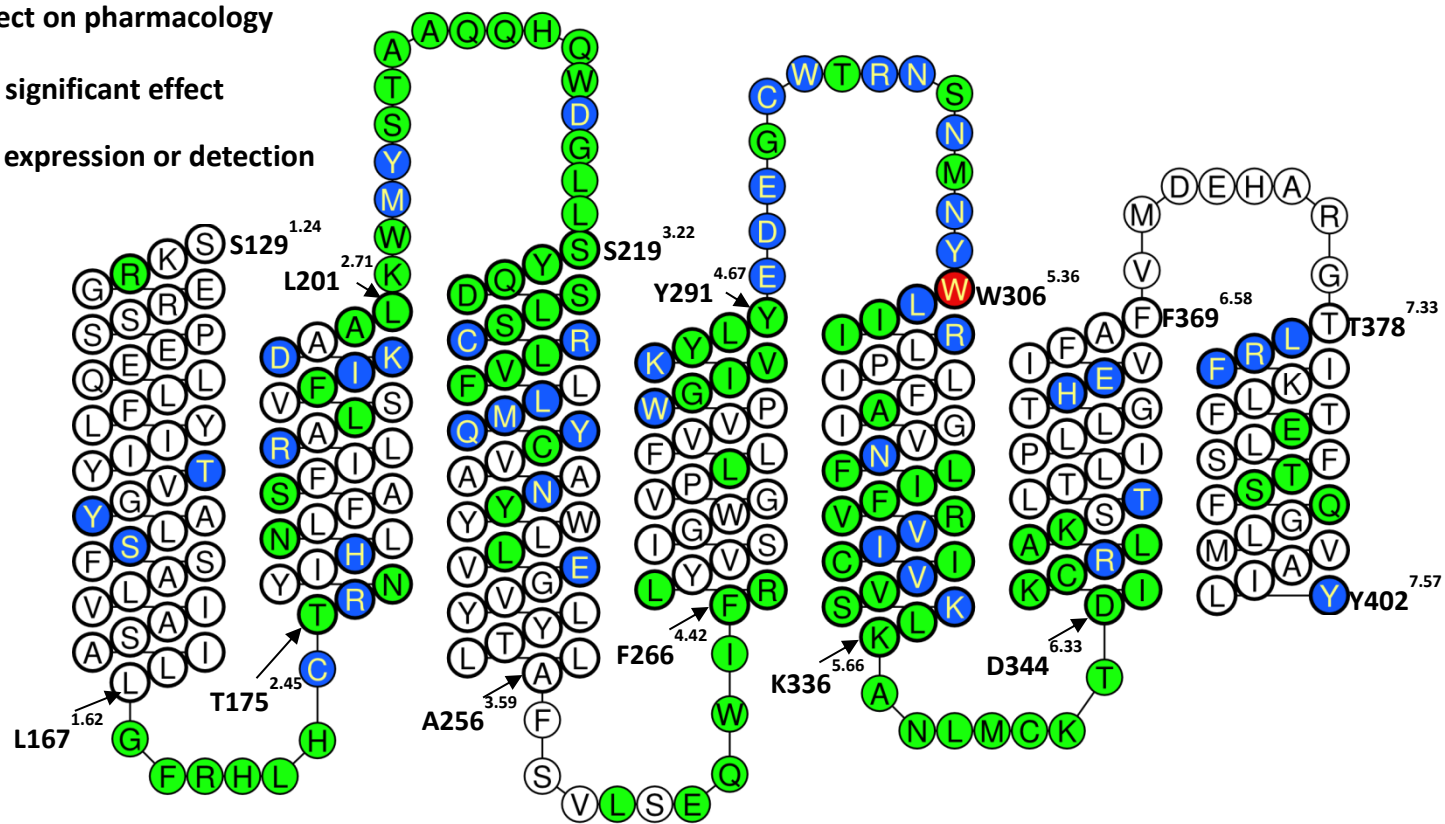

**Table S1:** Summary of effects on GLP-1 pharmacology (affinity and ability to activate cAMP pathway) in published site-directed mutagenesis studies focussed on residues in the transmembrane helices and loops of the 7TM domain of GLP-1R. **WT** refers to mutations which resulted in <5-fold or no statistically significant change from wild type GLP-1R. **ND** refers to a property that was measured but for which a value could not be reliably determined. **Blank cells** mean that the assays to estimate that particular pharmacological property were not carried in the cited work. Residues with symbol † refer to data from rat GLP-1R. E<sub>max</sub> and EC<sub>50</sub> values from Wootten *et al.* (2013) were a personal communication from Dr Denise Wootten.

| Residue                  | Mutated to... | -fold reduction in affinity | -fold reduction in potency | Comments and/or other effects                                 | Reference source                                                                  |
|--------------------------|---------------|-----------------------------|----------------------------|---------------------------------------------------------------|-----------------------------------------------------------------------------------|
| Arg131 <sup>1.26</sup>   | Asn           | WT                          | WT                         |                                                               | Koole et al. 2011                                                                 |
| Thr149 <sup>1.44</sup>   | Met           | 60                          | 30                         |                                                               | Beinborn et al. 2005                                                              |
| Thr149 <sup>1.44</sup>   | Met*          | 250                         | 160                        | E <sub>max</sub> = ND                                         | Koole et al. 2011<br>*For additional residue substitutions, see Koole et al. 2015 |
| Tyr-152 <sup>1.47</sup>  | Ala           | 30                          | ND                         | low B <sub>max</sub>                                          | Coopman et al. 2011                                                               |
| Ser-155 <sup>1.50</sup>  | Ala           | WT                          | 10                         | 38% E <sub>max</sub><br>ΔLog τ <sub>c</sub> = 0.75            | Wootten et al. 2013                                                               |
| Gly-168 <sup>ICL1</sup>  | Ser           | WT                          | WT                         |                                                               | Koole et al. 2011                                                                 |
| †Phe-169 <sup>ICL1</sup> | Ala           | WT                          |                            | WT cAMP 10 <sup>-7</sup> M GLP-1                              | Mathi et al. 1997                                                                 |
| †Arg-170 <sup>ICL1</sup> | Ala           | WT                          |                            | WT cAMP 10 <sup>-7</sup> M GLP-1                              | Mathi et al. 1997                                                                 |
| †His-171 <sup>ICL1</sup> | Ala           | WT                          |                            | WT cAMP 10 <sup>-7</sup> M GLP-1                              | Mathi et al. 1997                                                                 |
| †Leu-172 <sup>ICL1</sup> | Ala           | WT                          |                            | WT cAMP 10 <sup>-7</sup> M GLP-1                              | Mathi et al. 1997                                                                 |
| †His-173 <sup>ICL1</sup> | Ala           | WT                          |                            | WT cAMP 10 <sup>-7</sup> M GLP-1                              | Mathi et al. 1997                                                                 |
| †Cys-174 <sup>ICL1</sup> | Ala           | WT                          |                            | 37% cAMP 10 <sup>-7</sup> M GLP-1<br>but low B <sub>max</sub> | Mathi et al. 1997                                                                 |
| †Thr-175 <sup>2.45</sup> | Ala           | WT                          |                            | WT cAMP 10 <sup>-7</sup> M GLP-1                              | Mathi et al. 1997                                                                 |
| †Arg-176 <sup>2.46</sup> | Ala           | WT                          | 13                         | 26% cAMP 10 <sup>-7</sup> M GLP-1                             | Mathi et al. 1997                                                                 |
| †Asn-177 <sup>2.47</sup> | Ala           | WT                          |                            | 43% cAMP 10 <sup>-7</sup> M GLP-1<br>but low B <sub>max</sub> | Mathi et al. 1997                                                                 |
| †His-180 <sup>2.50</sup> | Arg           | 21                          |                            | Authors' quote "50% decrease in cAMP production"              | Heller et al. 1996                                                                |
| His-180 <sup>2.50</sup>  | Ala           | ND                          | 12                         | 30% E <sub>max</sub><br>ΔLog τ <sub>c</sub> = 0.86            | Wootten et al. 2013                                                               |
| †Asn-182 <sup>2.52</sup> | Ala           | WT                          |                            | low B <sub>max</sub>                                          | Xiao et al. 2000                                                                  |
| Ser-186 <sup>2.56</sup>  | Ala           | WT                          | WT                         |                                                               | Wootten et al. 2013                                                               |
| †Arg-190 <sup>2.60</sup> | Ala           | >20                         |                            | 27% cAMP 10 <sup>-7</sup> M GLP-1                             | Xiao et al. 2000                                                                  |
| Arg-190 <sup>2.60</sup>  | Ala           | 32                          | 270                        | low B <sub>max</sub>                                          | Coopman et al. 2011                                                               |
| Arg-190 <sup>2.60</sup>  | Ala           | 20                          | 34                         | 56% E <sub>max</sub><br>ΔLog τ <sub>c</sub> = 0.53            | Wootten et al. 2013                                                               |
| Leu-192 <sup>2.62</sup>  | Ser           |                             | WT                         |                                                               | Underwood et al. 2011                                                             |
| Phe-195 <sup>2.65</sup>  | Leu           |                             | WT                         |                                                               | Underwood et al. 2011                                                             |
| †Ile-196 <sup>2.66</sup> | Ser           | WT                          | ND                         |                                                               | Moon et al. 2012                                                                  |
| Lys-197 <sup>2.67</sup>  | Ala           | 28                          | 630                        |                                                               | Coopman et al. 2011                                                               |
| †Lys-197 <sup>2.67</sup> | Ala           | 5                           |                            | 25% cAMP 10 <sup>-7</sup> M GLP-1                             | Xiao et al. 2000                                                                  |
| †Asp-198 <sup>2.68</sup> | Ala           | 10                          |                            | 20% cAMP 10 <sup>-7</sup> M GLP-1                             | Xiao et al. 2000                                                                  |
| †Asp-198 <sup>2.68</sup> | Ala           | 63                          | 44                         |                                                               | Lopez & Donnelly 2002                                                             |
| †Asp-198 <sup>2.68</sup> | Asn           | 8                           |                            |                                                               | Lopez & Donnelly 2002                                                             |
| Asp-198 <sup>2.68</sup>  | Ala           | 43                          | 977                        |                                                               | Coopman et al. 2011                                                               |

| Residue                    | Mutated to... | -fold reduction in affinity | -fold reduction in potency | Comments and/or other effects                                | Reference source                                       |
|----------------------------|---------------|-----------------------------|----------------------------|--------------------------------------------------------------|--------------------------------------------------------|
| †Ala200-Leu201             | Val, Ala      | WT                          | WT                         |                                                              | Lopez et al. 2004                                      |
| †Lys-202 <sup>ECL1</sup>   | Ala           | WT                          |                            | 71% cAMP 10 <sup>-7</sup> M GLP-1                            | Xiao et al. 2000                                       |
| †Lys202-Trp203             | Ala, Ala      | WT                          | WT                         |                                                              | Lopez et al. 2004                                      |
| †Met204-Tyr205             | Ala, Ala      | 37                          | 51                         |                                                              | Lopez et al. 2004                                      |
| †Met204-Tyr205             | Val, Ala      | 23                          | 32                         |                                                              | Lopez et al. 2004                                      |
| †Met204-Tyr205             | Ala, Val      | 29                          | 87                         |                                                              | Lopez et al. 2004                                      |
| †Met204 <sup>ECL1</sup>    | Ala           | WT                          | WT                         |                                                              | Lopez et al. 2004                                      |
| †Tyr-205 <sup>ECL1</sup>   | Ala           | WT                          | WT                         |                                                              | Lopez et al. 2004                                      |
| †Ser206-Thr207             | Ala, Ala      | WT                          | WT                         |                                                              | Lopez et al. 2004                                      |
| †Ala208-Ala209             | Val, Val      | WT                          | WT                         |                                                              | Lopez et al. 2004                                      |
| †Gln210-Gln211             | Ala, Ala      | WT                          | WT                         |                                                              | Lopez et al. 2004                                      |
| †His-212 <sup>ECL1</sup>   | Ala           | WT                          |                            | WT cAMP 10 <sup>-7</sup> M GLP-1                             | Xiao et al. 2000                                       |
| †His212-Gln213             | Ala, Ala      | WT                          | WT                         |                                                              | Lopez et al. 2004                                      |
| †Asp-215 <sup>ECL1</sup>   | Ala           | WT                          |                            | 57% cAMP 10 <sup>-7</sup> M GLP-1                            | Xiao et al. 2000                                       |
| †Trp214-Asp215             | Ala, Ala      | WT                          | WT                         |                                                              | Lopez et al. 2004                                      |
| †Gly216-Leu217             | Ala, Ala      | WT                          | WT                         |                                                              | Lopez et al. 2004                                      |
| †Leu218-Ser219             | Ala, Ala      | WT                          | WT                         |                                                              | Lopez et al. 2004                                      |
| †Tyr220-Gln221             | Ala, Ala      | WT                          | WT                         |                                                              | Lopez et al. 2004                                      |
| †Asp-222 <sup>3.25</sup>   | Ala           | WT                          |                            | 82% cAMP 10 <sup>-7</sup> M GLP-1                            | Xiao et al. 2000                                       |
| †Asp222-Ser223             | Ala, Ala      | WT                          | WT                         |                                                              | Lopez et al. 2004                                      |
| †Leu224-Gly225             | Ala, Ala      | WT                          | WT                         |                                                              | Lopez et al. 2004                                      |
| †Cys-226 <sup>3.29</sup> * | Ala           | 25                          | 38                         |                                                              | Mann et al. 2010<br>*also included in double mutations |
| Cys-226 <sup>3.29</sup>    | Ala           |                             | >90                        |                                                              | Underwood et al. 2013                                  |
| †Arg-227 <sup>3.30</sup>   | Ala           | >20                         |                            | 90% cAMP 10 <sup>-7</sup> M GLP-1                            | Xiao et al. 2000                                       |
| †Arg227-Leu228             | Ala, Ala      | WT                          | WT                         |                                                              | Lopez et al. 2004                                      |
| †Val229-Phe230             | Ala, Ala      | WT                          | WT                         |                                                              | Lopez et al. 2004                                      |
| †Leu232-Met233             | Val, Thr      | 10                          | 100                        |                                                              | Moon et al. 2012                                       |
| Gln-234 <sup>3.37</sup>    | Ala           | 13                          | 45                         |                                                              | Coopman et al. 2011                                    |
| Tyr-235 <sup>3.38</sup>    | Ala           | 24                          | 23                         |                                                              | Coopman et al. 2011                                    |
| Cys-236 <sup>3.39</sup>    | Ala           |                             | WT                         |                                                              | Underwood et al. 2013                                  |
| †Asn-240 <sup>3.43</sup>   | Ala           | >20                         |                            | 8% cAMP 10 <sup>-7</sup> M GLP-1<br>but low B <sub>max</sub> | Xiao et al. 2000                                       |
| Asn-240 <sup>3.43</sup>    | Ala           | WT                          | 7                          | 78% E <sub>max</sub><br>ΔLog τ <sub>c</sub> = 0.67           | Wootten et al. 2013                                    |
| Tyr-241 <sup>3.44</sup>    | Ala           |                             | WT                         |                                                              | Underwood et al. 2011                                  |
| Glu-247 <sup>3.50</sup>    | Ala           | ND                          | 14                         | 19% E <sub>max</sub><br>ΔLog τ <sub>c</sub> = 0.99           | Wootten et al. 2013                                    |
| Phe-260 <sup>ICL2</sup>    | Leu           | WT                          | WT                         |                                                              | Koole et al. 2011                                      |
| †Glu-262 <sup>ICL2</sup>   | Ala           | WT                          |                            | WT cAMP 10 <sup>-7</sup> M GLP-1                             | Mathi et al. 1997                                      |
| †Gln-263 <sup>ICL2</sup>   | Ala           | WT                          |                            | WT cAMP 10 <sup>-7</sup> M GLP-1                             | Mathi et al. 1997                                      |
| †Arg-264 <sup>ICL2</sup>   | Ala           | WT                          |                            | WT cAMP 10 <sup>-7</sup> M GLP-1                             | Mathi et al. 1997                                      |
| †Ile-265 <sup>ICL2</sup>   | Ala           | WT                          |                            | WT cAMP 10 <sup>-7</sup> M GLP-1                             | Mathi et al. 1997                                      |
| †Phe-266 <sup>4.42</sup>   | Ala           | WT                          |                            | WT cAMP 10 <sup>-7</sup> M GLP-1                             | Mathi et al. 1997                                      |
| †Lys-267 <sup>4.43</sup>   | Ala           | WT                          |                            | WT cAMP 10 <sup>-7</sup> M GLP-1                             | Mathi et al. 1997                                      |
| †Leu-268 <sup>4.44</sup>   | Ala           | WT                          |                            | WT cAMP 10 <sup>-7</sup> M GLP-1                             | Mathi et al. 1997                                      |
| Leu-278 <sup>4.54</sup>    | Met           |                             | WT                         |                                                              | Underwood et al. 2011                                  |
| Trp-284 <sup>4.60</sup>    | Ala           | 32                          | 1349                       |                                                              | Coopman et al. 2011                                    |
| Gly-285 <sup>4.61</sup>    | Ala           | WT                          | WT                         |                                                              | Koole et al. 2012                                      |
| Ile-286 <sup>4.62</sup>    | Ala           | WT                          | WT                         |                                                              | Koole et al. 2012                                      |

| Residue                    | Mutated to... | -fold reduction in affinity | -fold reduction in potency | Comments and/or other effects     | Reference source                                       |
|----------------------------|---------------|-----------------------------|----------------------------|-----------------------------------|--------------------------------------------------------|
| Val-287 <sup>4.63</sup>    | Ala           | WT                          | WT                         |                                   | Koole et al. 2012                                      |
| Lys-288 <sup>4.64</sup>    | Ala           | 126                         | ND                         |                                   | Koole et al. 2012                                      |
| † Lys-288 <sup>4.64</sup>  | Ala           | 79                          | 251                        |                                   | Al-Sabah & Donnelly 2003                               |
| † Lys-288 <sup>4.64</sup>  | Leu           | 63                          | 79                         |                                   | Al-Sabah & Donnelly 2003                               |
| † Lys-288 <sup>4.64</sup>  | Arg           | WT                          | WT                         |                                   | Al-Sabah & Donnelly 2003                               |
| Tyr-289 <sup>4.65</sup>    | Ala           | WT                          | WT                         |                                   | Koole et al. 2012                                      |
| Leu-290 <sup>4.66</sup>    | Ala           | WT                          | WT                         |                                   | Koole et al. 2012                                      |
| Tyr-291 <sup>4.67</sup>    | Ala           | WT                          | WT                         |                                   | Koole et al. 2012                                      |
| † Leu290-Tyr291            | Ala, Ala      | WT                          | WT                         |                                   | Mann et al. 2010                                       |
| Glu-292 <sup>ECL2</sup>    | Ala           | 100                         | 126                        | $\Delta\text{Log } \tau_c = 0.57$ | Koole et al. 2012                                      |
| Asp-293 <sup>ECL2</sup>    | Ala           | 25                          | 16                         |                                   | Koole et al. 2012                                      |
| † Glu292-Asp293            | Ala, Ala      | 8                           | 79                         |                                   | Mann et al. 2010                                       |
| Glu-294 <sup>ECL2</sup>    | Ala           | WT                          | WT                         | $\Delta\text{Log } \tau_c = 0.65$ | Koole et al. 2012                                      |
| Gly-295 <sup>ECL2</sup>    | Ala           | WT                          | WT                         |                                   | Koole et al. 2012                                      |
| † Glu294-Gly295            | Ala, Ala      | WT                          | WT                         |                                   | Mann et al. 2010                                       |
| † Cys-296 <sup>ECL2*</sup> | Ala           | 18                          | WT                         |                                   | Mann et al. 2010<br>*also included in double mutations |
| Cys-296 <sup>ECL2</sup>    | Ala           | 13                          | 126                        |                                   | Koole et al. 2012                                      |
| Trp-297 <sup>ECL2</sup>    | Ala           | 63                          | 316                        | $\Delta\text{Log } \tau_c = 1.00$ | Koole et al. 2012                                      |
| Thr-298 <sup>ECL2</sup>    | Ala           | WT                          | WT                         |                                   | Koole et al. 2012                                      |
| † Trp297-Thr298            | Ala, Ala      | 100                         | 50                         |                                   | Mann et al. 2010<br>Donnelly 2012                      |
| Arg-299 <sup>ECL2</sup>    | Ala           | 32                          | 85                         | $\Delta\text{Log } \tau_c = 0.46$ | Koole et al. 2012                                      |
| Asn-300 <sup>ECL2</sup>    | Ala           | 126                         | 501                        | $\Delta\text{Log } \tau_c = 0.80$ | Koole et al. 2012                                      |
| † Arg299-Asn300            | Ala, Ala      | 251                         | >3000                      |                                   | Mann et al. 2010<br>Donnelly 2012                      |
| Ser-301 <sup>ECL2</sup>    | Ala           | WT                          | WT                         |                                   | Koole et al. 2012                                      |
| Asn-302 <sup>ECL2</sup>    | Ala           | 25                          | 16                         | $\Delta\text{Log } \tau_c = 0.53$ | Koole et al. 2012                                      |
| † Ser301-Asn302            | Ala, Ala      | WT                          | WT                         |                                   | Mann et al. 2010                                       |
| Met-303 <sup>ECL2</sup>    | Ala           | WT                          | WT                         |                                   | Koole et al. 2012                                      |
| Asn-304 <sup>ECL2</sup>    | Ala           | WT                          | WT                         | $\Delta\text{Log } \tau_c = 0.74$ | Koole et al. 2012                                      |
| † Met303-Asn304            | Ala, Ala      | WT                          | WT                         |                                   | Mann et al. 2010                                       |
| Tyr-305 <sup>5.35</sup>    | Ala           | 79                          | 40                         |                                   | Koole et al. 2012                                      |
| Trp-306 <sup>5.36</sup>    | Ala           | ND                          | ND                         | No receptor expression            | Koole et al. 2012                                      |
| † Tyr305-Trp306            | Ala, Ala      | 316                         | 50                         |                                   | Mann et al. 2010<br>Donnelly 2012                      |
| Leu-307 <sup>5.37</sup>    | Ala           | 13                          | 25                         | $\Delta\text{Log } \tau_c = 0.49$ | Koole et al. 2012                                      |
| † Leu307-Ile308            | Ala, Ala      | 251                         | 6                          |                                   | Mann et al. 2010<br>Donnelly 2012                      |
| Arg-310 <sup>5.40</sup>    | Ala           | 10                          | 1259                       |                                   | Coopman et al. 2011                                    |
| † Ile309-Arg310            | Ala, Ala      | 50                          | >3000                      |                                   | Mann et al. 2010<br>Donnelly 2012                      |
| Ala-316 <sup>5.46</sup>    | Thr           | WT                          | WT                         |                                   | Koole et al. 2011                                      |
| Asn-320 <sup>5.50</sup>    | Ala           | 18                          | 10                         | $\Delta\text{Log } \tau_c = 0.50$ | Wootten et al. 2013                                    |
| † Phe-321 <sup>5.51</sup>  | Ala           | WT                          |                            | WT cAMP $10^{-7}$ M GLP-1         | Mathi et al. 1997                                      |
| † Leu-322 <sup>5.52</sup>  | Ala           | WT                          |                            | WT cAMP $10^{-7}$ M GLP-1         | Mathi et al. 1997                                      |
| † Ile-323 <sup>5.53</sup>  | Ala           | WT                          |                            | WT cAMP $10^{-7}$ M GLP-1         | Mathi et al. 1997                                      |
| † Phe-324 <sup>5.54</sup>  | Ala           | WT                          |                            | WT cAMP $10^{-7}$ M GLP-1         | Mathi et al. 1997                                      |
| † Ile-325 <sup>5.55</sup>  | Ala           | WT                          |                            | WT cAMP $10^{-7}$ M GLP-1         | Mathi et al. 1997                                      |
| † Phe-326 <sup>5.56</sup>  | Ala           | WT                          |                            | WT cAMP $10^{-7}$ M GLP-1         | Mathi et al. 1997                                      |

| Residue                   | Mutated to... | -fold reduction in affinity | -fold reduction in potency | Comments and/or other effects                      | Reference source                                                                  |
|---------------------------|---------------|-----------------------------|----------------------------|----------------------------------------------------|-----------------------------------------------------------------------------------|
| † Val-327 <sup>5.57</sup> | Ala           | WT                          | 15                         |                                                    | Mathi et al. 1997                                                                 |
| † Ile-328 <sup>5.58</sup> | Ala           | WT                          | 9                          |                                                    | Mathi et al. 1997                                                                 |
| † Cys-329 <sup>5.59</sup> | Ala           | WT                          |                            | WT cAMP $10^{-7}$ M GLP-1                          | Mathi et al. 1997                                                                 |
| † Ile-330 <sup>5.60</sup> | Ala           | WT                          |                            | WT cAMP $10^{-7}$ M GLP-1                          | Mathi et al. 1997                                                                 |
| † Val-331 <sup>5.61</sup> | Ala           | WT                          | 14                         |                                                    | Mathi et al. 1997                                                                 |
| † Ile-332 <sup>5.62</sup> | Ala           | WT                          |                            | WT cAMP $10^{-7}$ M GLP-1                          | Mathi et al. 1997                                                                 |
| † Ala-333 <sup>5.63</sup> | Leu           | WT                          |                            | WT cAMP $10^{-7}$ M GLP-1                          | Mathi et al. 1997                                                                 |
| Ser-333 <sup>5.63</sup>   | Cys           | WT                          | WT                         |                                                    | Koole et al. 2011<br>*For additional residue substitutions, see Koole et al. 2015 |
| † Lys-334 <sup>5.64</sup> | Ala           | WT                          |                            | 28% cAMP $10^{-7}$ M GLP-1                         | Mathi et al. 1997<br>Takar et al. 1996                                            |
| † Leu-335 <sup>5.65</sup> | Ala           | WT                          |                            | WT cAMP $10^{-7}$ M GLP-1                          | Mathi et al. 1997                                                                 |
| † Lys-336 <sup>5.66</sup> | Leu           | WT                          |                            | WT cAMP $10^{-7}$ M GLP-1                          | Mathi et al. 1997                                                                 |
| Lys334-Lys351             | Deletions     | WT                          |                            | See paper for detail                               | Takar et al. 1996                                                                 |
| Cys-347 <sup>6.36</sup>   | Ala           |                             | WT                         |                                                    | Underwood et al. 2013                                                             |
| † Arg-348 <sup>6.37</sup> | Gly           | 12                          | ND                         |                                                    | Heller et al. 1996                                                                |
| † Arg-348 <sup>6.37</sup> | Ala           | WT                          |                            | WT cAMP $10^{-7}$ M GLP-1                          | Takar et al. 1996                                                                 |
| † Leu-349 <sup>6.38</sup> | Ala           | WT                          |                            | WT cAMP $10^{-7}$ M GLP-1                          | Takar et al. 1996                                                                 |
| † Ala-350 <sup>6.39</sup> | Glu           | ND                          |                            | Low $B_{max}$                                      | Takar et al. 1996                                                                 |
| † Ala-350 <sup>6.39</sup> | Lys           | WT                          |                            | Low $B_{max}$                                      | Takar et al. 1996                                                                 |
| † Lys-351 <sup>6.40</sup> | Ala           | WT                          |                            | WT cAMP $10^{-7}$ M GLP-1                          | Takar et al. 1996                                                                 |
| Thr-353 <sup>6.42</sup>   | Ala           | ND                          | 22                         | 42% $E_{max}$<br>$\Delta\text{Log } \tau_c = 0.84$ | Wootten et al. 2013                                                               |
| His-363 <sup>6.52</sup>   | Ala           | 98                          | ND                         |                                                    | Coopman et al. 2011                                                               |
| His-363 <sup>6.52</sup>   | Ala           | 23                          | 4                          | 17% $E_{max}$<br>$\Delta\text{Log } \tau_c = 1.71$ | Wootten et al. 2013                                                               |
| Glu-364 <sup>6.53</sup>   | Ala           | 58                          | 15                         |                                                    | Coopman et al. 2011                                                               |
| Leu-379 <sup>7.33</sup>   | Arg           | 12                          | 141                        |                                                    | Moon et al. 2015                                                                  |
| Leu-379 <sup>7.33</sup>   | Glu           | 11                          | 165                        |                                                    | Moon et al. 2015                                                                  |
| Arg-380 <sup>7.34</sup>   | Asp           | 21                          | 1853                       |                                                    | Moon et al. 2015                                                                  |
| Arg-380 <sup>7.34</sup>   | Gly           | 4                           | 40                         |                                                    | Moon et al. 2015                                                                  |
| Phe-381 <sup>7.35</sup>   | Arg           | WT                          | WT                         |                                                    | Moon et al. 2015                                                                  |
| Phe-381 <sup>7.35</sup>   | Glu           | >200                        | 234                        |                                                    | Moon et al. 2015                                                                  |
| Glu-387 <sup>7.41</sup>   | Ala           | WT                          | WT                         |                                                    | Coopman et al. 2011                                                               |
| Thr-391 <sup>7.45</sup>   | Ala           | WT                          | WT                         |                                                    | Coopman et al. 2011                                                               |
| Thr-391 <sup>7.45</sup>   | Ala           |                             | WT                         |                                                    | Underwood et al. 2011                                                             |
| Ser-392 <sup>7.46</sup>   | Ala           | WT                          | WT                         |                                                    | Wootten et al. 2013                                                               |
| Gln-394 <sup>7.49</sup>   | Ala           | WT                          | WT                         | $\Delta\text{Log } \tau_c = 0.36$                  | Wootten et al. 2013                                                               |
| Tyr-402 <sup>7.57</sup>   | Ala           | ND                          | 10                         | 10% $E_{max}$<br>$\Delta\text{Log } \tau_c = 1.59$ | Wootten et al. 2013                                                               |

Al-Sabah S, Donnelly D (2003). The positive charge at Lys-288 of the glucagon-like peptide-1 (GLP-1) receptor is important for binding the N-terminus of peptide agonists. FEBS Lett 553: 342-346.

Beinborn M, Worrall CI, McBride EW, Kopin AS (2005). A human glucagon-like peptide-1 receptor polymorphism results in reduced agonist responsiveness. Regul Pept 130: 1-6.

Coopman et al. (2011) Residues within the transmembrane domain of the glucagon-like peptide-1 receptor involved in ligand binding and receptor activation: modelling the ligand-bound receptor. *Mol Endocrinol* 25: 1804-1818.

Heller RS, Kieffer TJ, Habener JF (1996). Point Mutations in the First and Third Intracellular Loops of the Glucagon-like Peptide-1 Receptor Alter Intracellular Signaling. *Biochem Biophys Res Commun* 223: 624-632.

Koole et al (2011) Polymorphism and ligand dependent changes in human glucagon-like peptide-1 receptor (GLP-1R) function: allosteric rescue of loss of function mutation. *Mol Pharm* 80:486-497

Koole et al., (2012) Second extracellular loop of human glucagon-like peptide-1 receptor (GLP-1R) has a critical role in GLP-1 peptide binding and receptor activation. *JBC* 287:3642-3658

López de Maturana R, Donnelly D (2002). The glucagon-like peptide-1 receptor binding site for the N-terminus of GLP-1 requires polarity at Asp198 rather than negative charge. *FEBS Lett* 530: 244-248.

López de Maturana R, Treece-Birch J, Abidi F, Findlay JB, Donnelly D (2004). Met-204 and Tyr-205 are together important for binding GLP-1 receptor agonists but not their N-terminally truncated analogues. *Protein Pept Lett* 11: 15-22.

Mann RJ, Al-Sabah S, López de Maturana R, Sinfield JK, Donnelly D (2010). Functional coupling of Cys-226 and Cys-296 in the glucagon-like peptide-1 (GLP-1) receptor indicates a disulfide bond that is close to the activation pocket. *Peptides* 31: 2289-2293.

Mathi SK, Chan Y, Li X, Wheeler MB (1997). Scanning of the Glucagon-Like Peptide-1 Receptor Localizes G Protein-Activating Determinants Primarily to the N Terminus of the Third Intracellular Loop. *Mol Endocrinol* 11: 424-432.

Moon et al. (2012) Evolutionarily conserved residues at glucagon-like peptide-1 (GLP-1) receptor core confer ligand-induced receptor activation. *J Biol Chem* 287: 3873-3884

Moon et al. (2015) Ligand binding pocket formed by evolutionarily conserved residues in the glucagon-like peptide-1 (GLP-1) receptor core domain. *J. Biol. Chem.* 290: 5696-5706.

Takhar A, Gyomory S, Su R-C, Mathi SK, Li X, Wheeler MB (1996). The Third Cytoplasmic Domain of the GLP-1[7-36 amide] Receptor is Required for Coupling to the Adenylyl Cyclase System. *Endocrinology* 137: 2175-2178.

Underwood CR, Møller Knudsen S, Schjellerup Wulff B, Bräuner-Osborne H, Lau J, Knudsen LB, Peters GH and Reedtz-Runge S. (2011) Transmembrane  $\alpha$ -helix 2 and 7 are important for small molecule-mediated activation of the GLP-1 receptor. *Pharmacology* 88: 340-348.

Underwood et al., (2013) Development of a cysteine-deprived and C-terminally truncated GLP-1 receptor. *Peptides* 49: 100-108

Wooten D, et al., (2013) Polar transmembrane interactions drive formation of ligand-specific and signal pathway-biased family B G protein-coupled receptor conformations. *PNAS* 110: 5211-5216

Xiao Q, Jeng W, Wheeler MB (2000). Characterization of glucagon-like peptide-1 receptor binding determinants. *J Mol Endocrinol* 25: 321-335.

**Table S2:** Pharmacological properties of wild-type and ECL2/TM5 interface double mutant receptors.

| Mutant                  | GLP-1 (7-36)-NH <sub>2</sub> pEC <sub>50</sub> | Specific Binding (%) |
|-------------------------|------------------------------------------------|----------------------|
| <b>Wild type GLP-1R</b> | <b>10.81 ± 0.29</b>                            | <b>100</b>           |
| IV 286 287 AA           | 10.94 ± 0.10                                   | 84.6 ± 2.0           |
| <b>KY 288 289 AA</b>    | <b>7.47 ± 0.43 (2188)**</b>                    | <b>28.3 ± 2.5***</b> |
| LY 290 291 AA           | 11.33 ± 0.36                                   | 99.0 ± 0.1           |
| ED 292 293 AA           | 9.41 ± 0.24 (25)*                              | 75.3 ± 4.0           |
| EG 294 295 AA           | 10.86 ± 0.51                                   | 97.2 ± 0.2           |
| WT 297 298 AA           | 9.47 ± 0.26 (22)*                              | 57.1 ± 8.6**         |
| <b>RN 299 300 AA</b>    | <b>8.29 ± 0.36 (331)**</b>                     | <b>41.1 ± 6.2**</b>  |
| SN 301 302 AA           | 11.06 ± 0.28                                   | 85.8 ± 2.5           |
| MN 303 304 AA           | 11.49 ± 0.16                                   | 90.8 ± 1.1           |
| <b>YW 305 306 AA</b>    | <b>8.39 ± 0.25 (263)**</b>                     | <b>60.1 ± 1.5***</b> |
| L307A                   | 10.67 ± 0.11                                   | 87.2 ± 1.9           |
| I308A                   | 10.47 ± 0.06                                   | 77.7 ± 1.1           |
| <b>IR 309 310 AA</b>    | <b>6.68 ± 0.33 (13490)***</b>                  | <b>13.4 ± 5.9***</b> |
| LP 311 312 AA           | 10.19 ± 0.20                                   | 90.7 ± 0.4           |

Following observed differences between the published pharmacological properties of ECL2 mutants in the rat [17, 29] and human GLP-1Rs [30], our previous double mutant rat GLP-1R screen was repeated, and slightly extended, in human GLP-1R as shown in the table. As we were initially unable to generate the LI 307 308 AA double mutant via QuikChange, we made the individual single mutants directly. The most interesting residues were identified using a low resolution pharmacological screen: pEC<sub>50</sub> values were obtained from a 3-parameter logistic analysis of LANCE cAMP assays, with the fold difference in potency compared with the wild type hGLP-1R shown in brackets; effects upon affinity were estimated by calculating specific binding, as a percentage of total binding, using <sup>125</sup>I-GLP-1 (7-36) at 75 pM against non-radiolabelled GLP-1 at 4 x 10<sup>-6</sup> M. Values illustrate the mean ± SEM, significantly different from wild-type value, \*p<0.05, \*\*p<0.01, \*\*\*p<0.001. The profile of ECL2 matched that seen in rat GLP-1R, with residue pairs 292/293, 297/298, 299/300, 305/306 and 309/310 having lower potency. An additional double mutation, KY 288 289 AA, displayed reduced potency and specific binding. Over all, there were four ECL2 double mutants (KY 288 289 AA; RN 299 300 AA; YW 305 306 AA; and IR 309 310 AA) with a particularly large and significant decrease in both potency and specific binding compared with wild-type, and were therefore mutated individually and analysed in more detail (see body of main paper). The ED 292 293 AA and WT 297 298 AA mutations were not pursued further in this study, despite some affect upon the pharmacology. Glu292, Asp293 and Trp306 have been shown to be important in GLP-1 pharmacology [30].



**Figure S3:** Comparison of GLP-1 model described this paper (light blue receptor, purple ligand) with the glucagon receptor model of Siu *et al.* (2013) (red receptor, orange ligand). **A** Two perpendicular views of the models superimposed via their TM domains to highlight the different relative orientations of the NTD and ligand. In the Siu *et al.* model, the helix of the ligand is much closer to the stalk region, while in our model it is translated towards TM5 and TM6. **B** The same structural alignment as **A**, but with the TM domains removed to show the N-terminus of ligands. The different conformations mean that they would interact with different residues in the TMD. **C** The aligned ligands, showing the PACAP21-based conformation in purple and the more extended conformation of Siu *et al.* in orange.

**A**

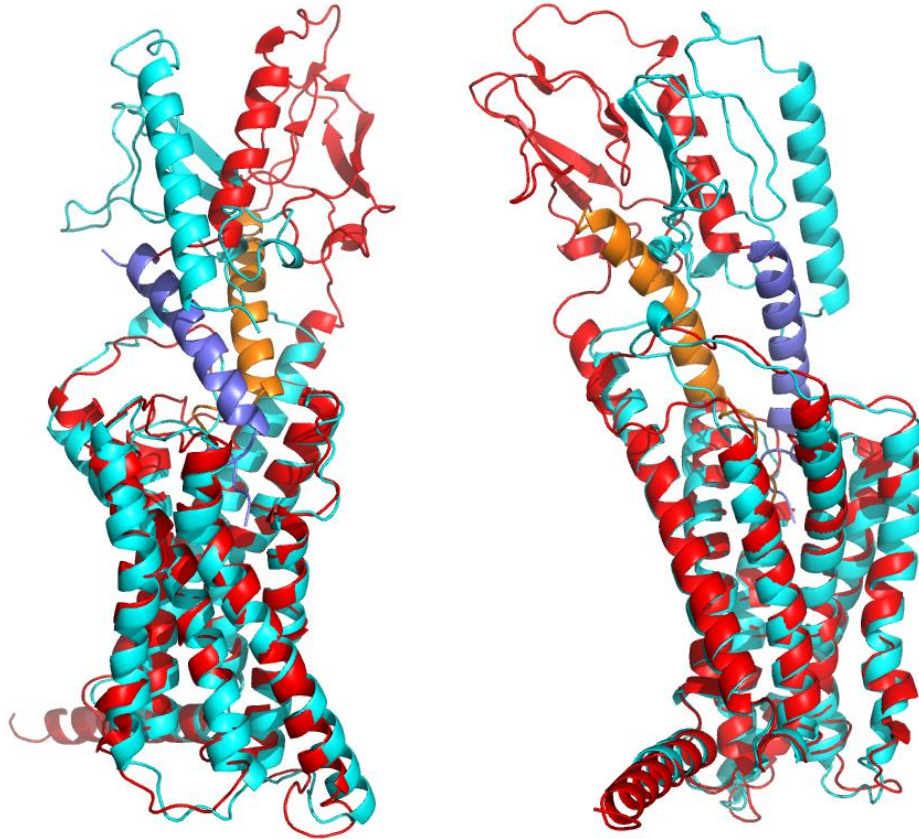

**B**

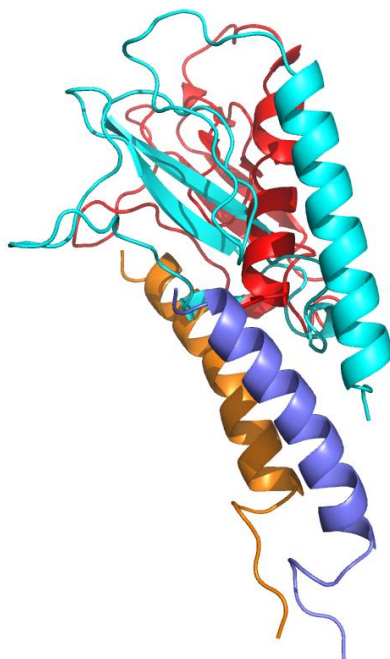

**C**

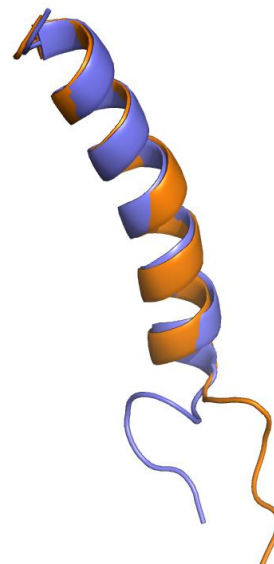

**Figure S4:** Hypothetical binding of GLP-1(1-36) to GLP-1R to explain how the additional 6 N-terminal resiudes can be accomodated in the binding cavity. The ligand is shown in cartoon form in yellow, with the receptor surface shown in green or cyan (residues lining the “residual pocket”). **A** View from above, showing the side chain of His-7\* at the base of the cavity, with the residues 1\*-6\* coming towards the page and making use of the residual pocket and gap between TM5/ECL2 (left) and TM6/ECL3 (right). **B** View from side.

**A**

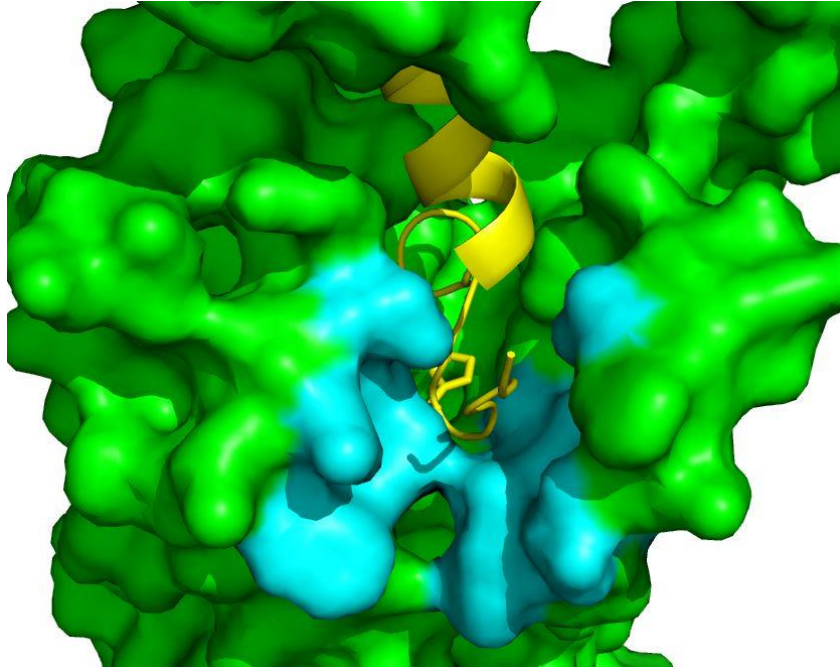

**B**

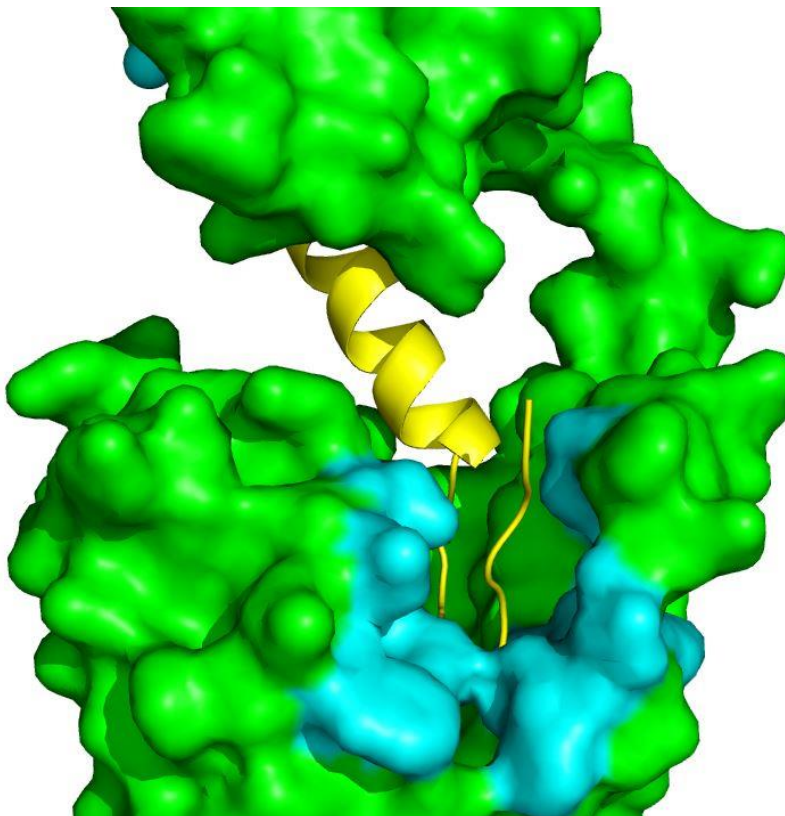

**Figure S5:** Schematic of hypothetical conformational states involving domain movement and ligand binding (see Discussion).

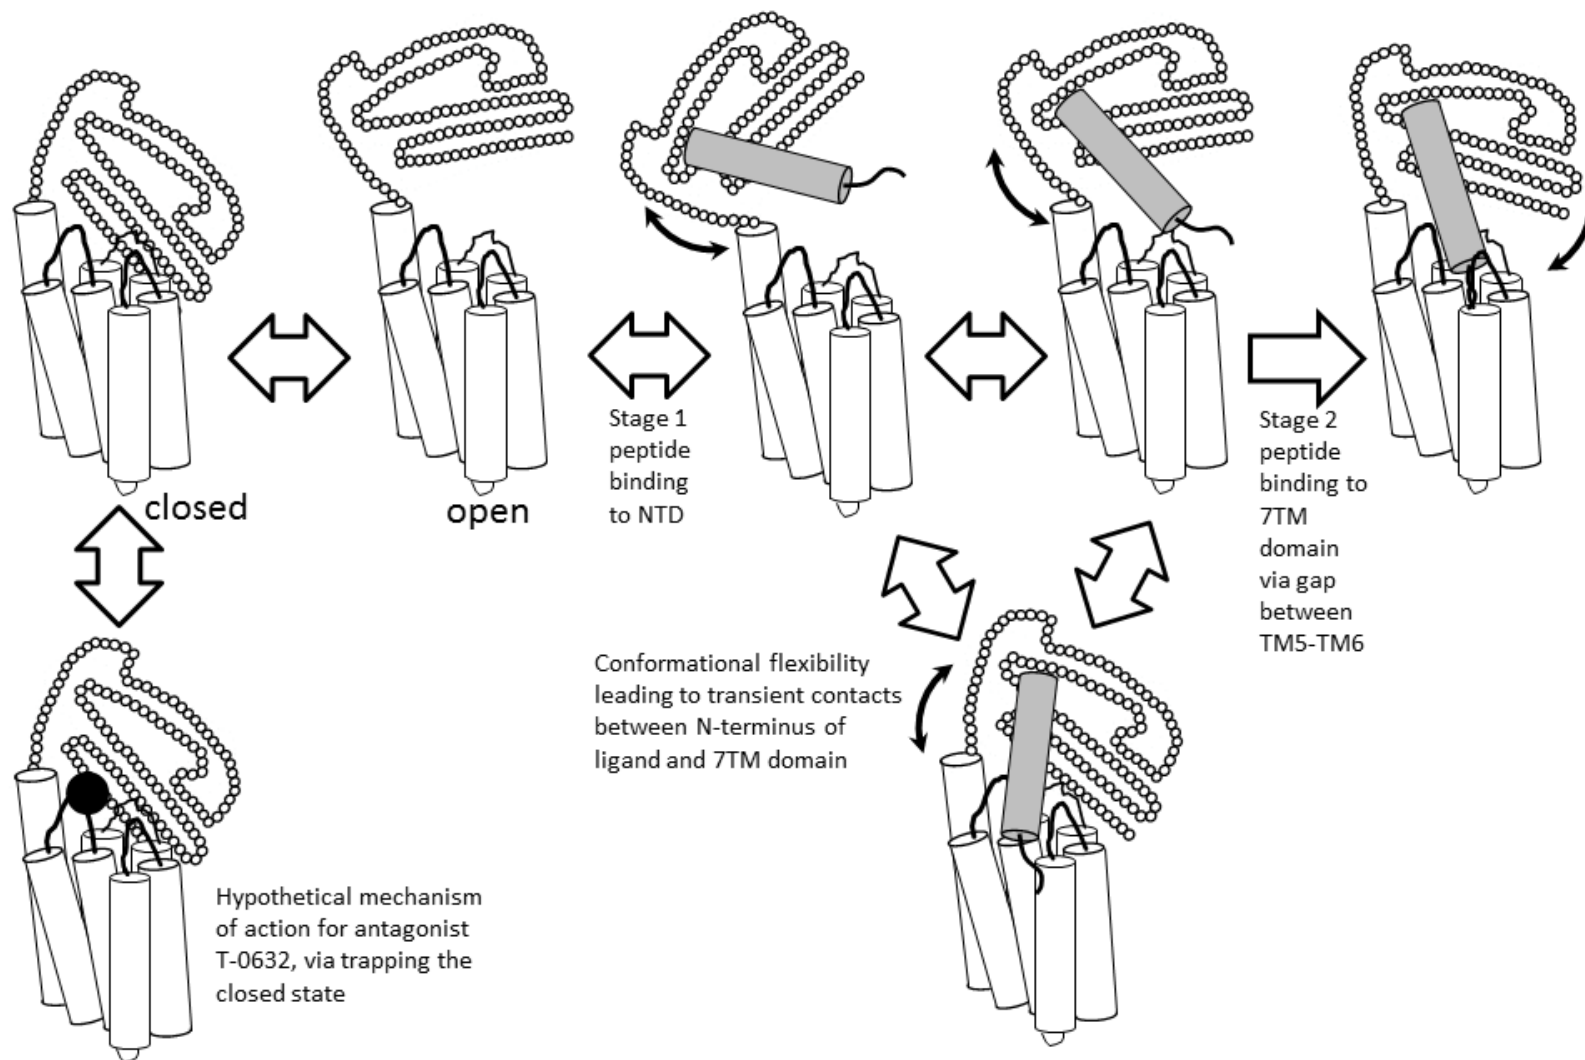

**Figure S6:** A-C Surface representations of glucagon receptor 4L6R (A), CRF1 receptor 4K5Y (B) and the model of GLP-1R (C). A gap can be seen between TM5 (green) and TM6 (orange) and between ECL2 (red) and ECL3 (cyan) which could allow entry of the N-terminal region of the ligand (purple) into the binding pocket from the side.

A

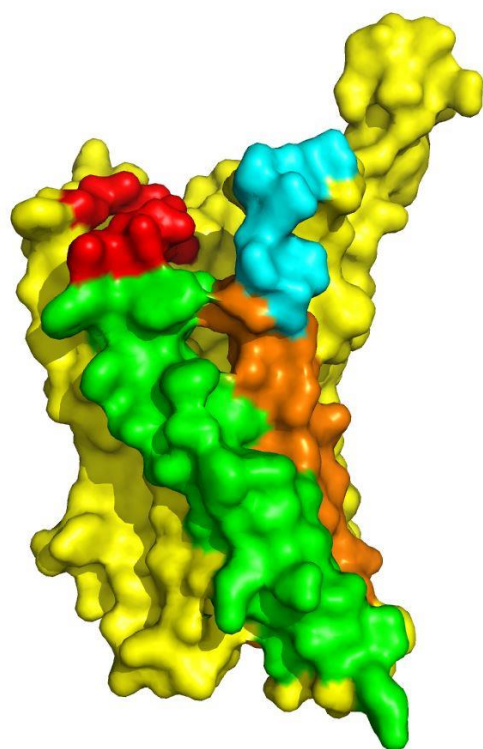

B

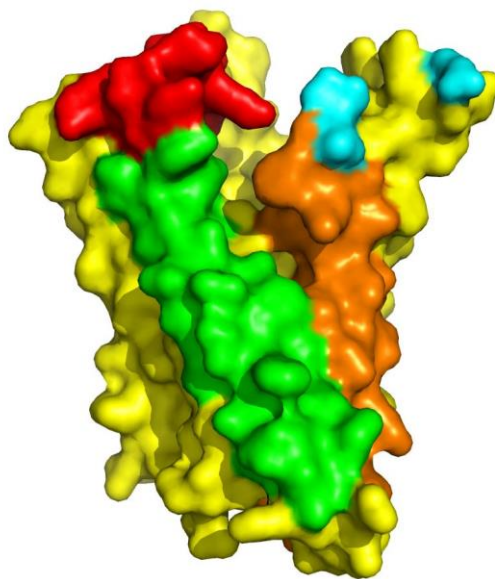

C

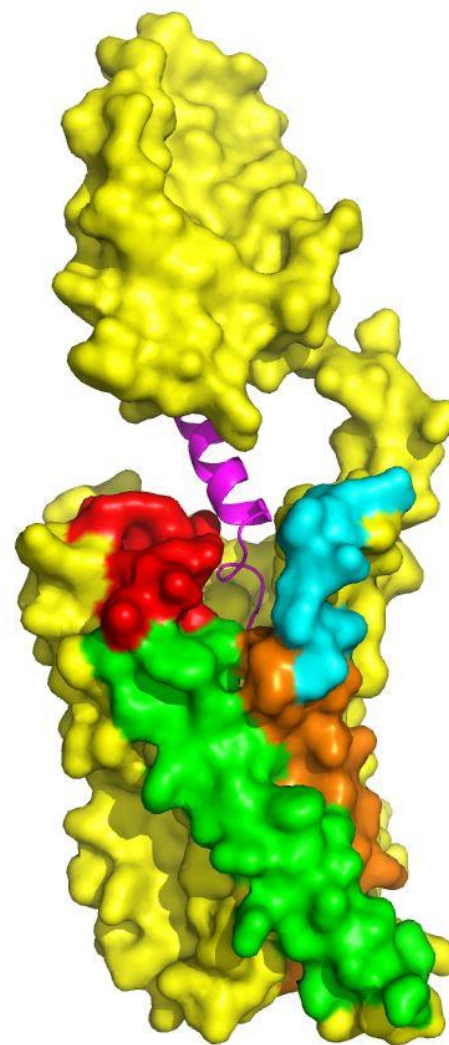

**Figure S7:** A-C The 7TM domain of the glucagon receptor 4L6R (green) with residues 5.44, 6.53, 6.56 and 6.57 mutated to Cys and shown as spheres (A- side view; B. top view; C top view with binding cavity as surface. In PTH<sub>1</sub>, all four residues (mutated individually [49]) could be disulphide linked to an analogue of PTH with Cys at residue position 1. While the three TM6 residues line the binding cavity and would be expected to be accessible to the N-terminus of the ligand, residue 5.44 is lipid facing and hence more difficult to explain. However, entry of the ligand's N-terminus via the TM5-TM6 gap (Figure S6) would allow transient contact between the cysteine residues and disulphide formation.

A

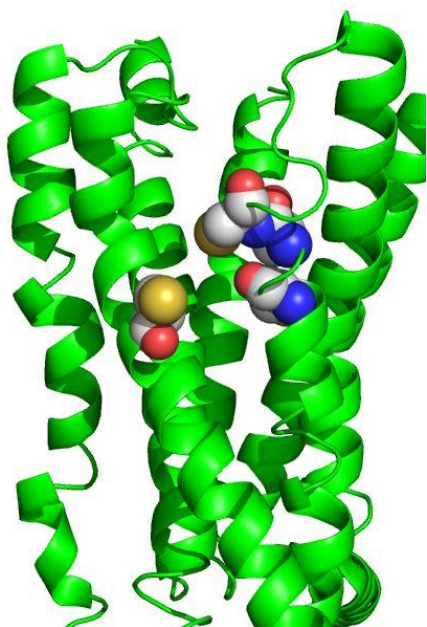

B

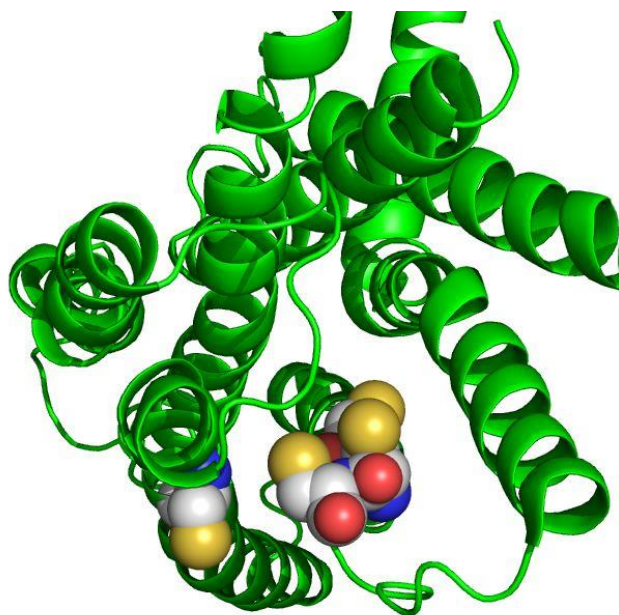

C

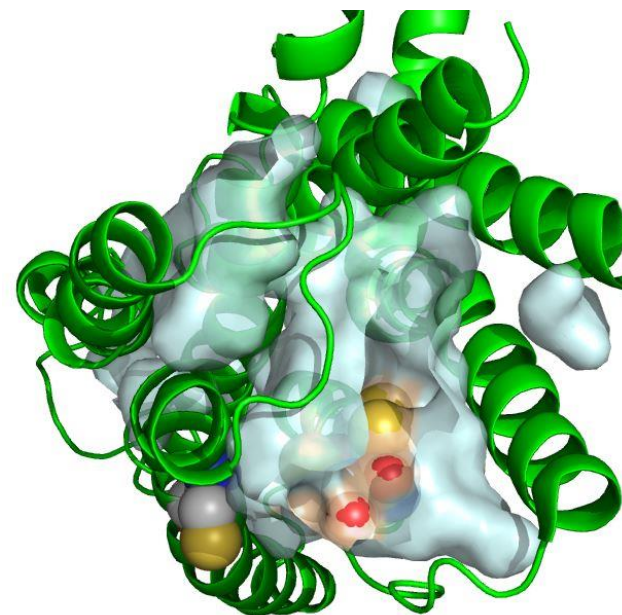

Supplement: bsr036e285add.pdf [file bsr036e285add.pdf]
